# Supplementary material
Source: publisher site journal article supplement (https://www.degruyterbrill.com/publication/dbid/tjgo/downloadAsset/TJGO_TJGO_Zur_Einrichtung_der_Edition.pdf)
Supplement: Supplementary file 1 [file TJGO_TJGO_Zur_Einrichtung_der_Edition.pdf]

# **Zur Einrichtung der Edition**

1. Gesamtedition und Chronologisierungsprinzip
2. Überlieferung
3. Kopfregesten
4. Textbearbeitung
  - a) Behandlung der militärischen Lage im maschinenschriftlichen Tagebuch
  - b) Editorische Eingriffe
  - c) Korrekturen des Stenographen
  - d) Redaktionelle Vermerke des Stenographen im maschinenschriftlichen Tagebuch
  - e) Schäden
  - f) Erschließungs- und Rekonstruktionsarbeiten
  - g) Interpunktion, Sprache und Orthographie
  - h) Richtigstellungen in Anmerkungen
5. Bestandsübersicht
6. Register
  - a) Personenregister
  - b) Geographisches Register
  - c) Transkription

Die Richtlinien zur Einrichtung der hier vorgelegten Edition sind das Ergebnis zahlreicher Beratungen im Kollegenkreis, anfänglich, in einem Vorstadium des Projekts, vor allem mit Professor Dr. Ludolf Herbst, Dr. Klaus-Dietmar Henke, Dr. Christoph Weisz, Dr. Norbert Frei, Dr. Lothar Gruchmann und Dr. Clemens Vollnhals, später auf der Grundlage neu hinzugekommener Bestände im engeren Kreis der Bearbeiter einzelner Vierteljahresbände, an denen neben der Herausgeberin regelmäßig Dr. Volker Dahm, Hermann Graml, Dr. Maximilian Gscheid, Dr. Manfred Kittel, Dr. habil. Hartmut Mehringer und Dr. Dieter Marc Schneider teilnahmen. Besonders wertvoll war die stets präsente Entscheidungskraft von Professor Dr. Horst Möller, Direktor des Instituts für Zeitgeschichte.

## 1. Gesamtedition und Chronologisierungsprinzip

Es werden sämtliche aufgefundenen, authentischen Tagebucheintragungen in voller Länge in der korrigierten Fassung letzter Hand veröffentlicht - inklusive des im maschinenschriftlichen Teil jeweils einem Eintrag vorangestellten militärischen Lageberichts. Der Charakter der dieser Edition zugrundeliegenden Quelle, ein Tagebuch mit nahezu täglichen Notaten, die anfangs noch am Tag der Ereignisse, später am darauffolgenden Tag vorgenommen wurden, läßt eine chronologische, vom Überlieferungszusammenhang unabhängige Reihung der Eintragungen als selbstverständlich erscheinen. Maßgebend für die Anordnung ist das jeweilige Datum, mit dem ein Eintrag beginnt, ohne Rücksicht darauf, ob er an dem ausgewiesenen Tag auch tatsächlich von Joseph Goebbels geschrieben, diktiert oder von dessen Stenographen in Maschinenschrift übertragen worden ist.

## 2. Überlieferung

Die Quelle besteht aus handschriftlichen (Teil I der Edition) und aus maschinenschriftlichen (Teil II der Edition) Tagebüchern. Sie liegt in verschiedenen fragmentierten Überlieferungen (Originale, Mikrofiches, Mikrofilme) vor, die, soweit sie zeitlich parallel vorhanden sind, bis auf eine weiter unten erörterte Ausnahme völlige Identität aufweisen. Die Grundlage der Edition bilden die Originale, die im Institut für Zeitgeschichte München (IfZ), in der Hoover Institution Stanford (HI), in den National Archives Washington (NA) und im ehemaligen Sonderarchiv, heute Zentrum für die Aufbewahrung historisch-dokumentarischer Sammlungen Moskau (ZAS), archiviert sind, sowie die von den Originalen hergestellten zeitgenössischen Mikrofiches auf Glasplatten, die sich in der Masse ebenfalls im letztgenannten Archiv befinden; ein Splitterbestand (der im Gegensatz zu sämtlichen anderen Überlieferungen erst im Jahre 2002 zugänglich geworden ist) dieser Glasplatten liegt im Archiv des französischen Außenministeriums. Sie gelten angesichts der sehr gestörten Überlieferung der Papieroriginale als der geschlossenste Bestand. Diese originaläquivalente Kopie weist im handschriftlichen Tagebuch keine und im maschinenschriftlichen Tagebuch verhältnismäßig wenig Lücken auf und stellt oftmals die einzige Überlieferungsform dar. Nur wenn im maschinenschriftlichen Teil der Tagebücher keine dieser Originalüberlieferungen vorliegen, wird auf die Zweitschrift (Durchschlag) zurückgegriffen, die im Zuge der politischen Wende in der ehemaligen DDR vom Dokumentationszentrum der Staatlichen Archivverwaltung (Ministerium des Innern) an das Zentrale Staatsarchiv Potsdam, heute Bundesarchiv (BA), Abteilungen Berlin, gelangte. Die Zweitschrift ist nicht immer identisch mit der Erstschrift, da sie nicht alle Korrekturen des Stenographen enthält. Wenn sie auch in seltenen Fällen Verbesserungen aufweist, die versehentlich nur in der Zweitschrift vorgenommen wurden (z. B. korrigierte Foliiierung oder vervollständigte militärische Lage), so kann doch die Überlieferung im BA Berlin im Gegensatz zu den ersterwähnten Überlieferungen nicht als Fassung letzter Hand gelten. Die ersten vier Überlieferungsstränge der Diktate (IfZ-, HI-, NA-Originale und ZAS-Mikrofiches) sind Fassung letzter Hand und somit gleichrangig. Von diesen wurde die jeweils vollständigere Überlieferung als Editionsgrundlage gewählt und mit den als gleichrangig

geltenden Originalen kollationiert (d. h. IfZ/ZAS, HI/ZAS, NA/ZAS), um sicherzugehen, daß Glasplatten und Papieroriginale tatsächlich übereinstimmen. Sind für einen Tagebucheintrag oder einzelne Abschnitte daraus weder IfZ- noch HI- bzw. NA-Überlieferungen vorhanden, wurden zur Kollationierung der ZAS-Mikrofiches die BA-Originale (Durchschlag) herangezogen.

Tagebucheintragungen, die in keiner der genannten originalen bzw. originaläquivalenten Überlieferungen enthalten sind oder in vergleichsweise schlechterer Überlieferung vorliegen, aber auf einem vom ZAS dem IfZ neuerdings zugänglich gemachten Mikrofilm (ZAS-M) gut leserlich abgelichtet sind, finden ebenfalls Aufnahme in der Edition. Aus gewissen Indizien (z. B. für die Glasplatten typische Schäden) kann eindeutig der Schluß gezogen werden, daß es sich um eine Mikroverfilmung der Glasplatten handelt und somit auch auf dem Mikrofilm eine Fassung letzter Hand überliefert ist. Desgleichen wird verfahren mit einem vor zwei Jahrzehnten ebenfalls aufgrund des Glasplatten-Bestandes hergestellten Mikrofilm. Vergleiche zwischen den Originalen und dem Mastermikrofilm (BA-M), der im BA Berlin aufbewahrt wird, ergaben inhaltliche und formale Identität. Dennoch werden Einträge, die ausschließlich einen der genannten Mikrofilme zur Grundlage haben, optisch deutlich als Sekundärüberlieferung durch Kapitälchen vom originalüberlieferten Text abgehoben. Ist hingegen die Authentizität eines auf Mikrofilm überlieferten Eintrags durch eine Zweitüberlieferung gewährleistet, erscheint der Text in Normaldruck.

Die zur Kollationierung herangezogenen Überlieferungsstränge werden nicht nur jeweils im Kopfregeft festgehalten, sondern auch im Anhang eines jeden Bandes tabellarisch aufgelistet; in Teil I jeweils die Bestandsübersicht über sämtliche handschriftliche Tagebücher, in Teil II jeweils für den im Band behandelten Zeitraum. Bei schwer leserlichem oder zerstörtem Text, auch bei einzelnen Wörtern oder auch nur einem einzelnen Buchstaben wird – falls möglich – an der entsprechenden Stelle ein Wechsel auf eine in dieser Passage lesbare Überlieferung vorgenommen, der sowohl im Kopfregeft als auch im laufenden Dokumententext vermerkt wird. Fehlen längere Passagen aus der Erstüberlieferung, die in einer nächstrangigen Überlieferung vorhanden sind, wird letztere zur Editionsgrundlage bestimmt.

Fanden sich in der Erstüberlieferung gelegentlich zwei Varianten eines militärischen Lageberichts zu ein und demselben Datum, so wurde die Fassung mit der zeitgenössischen Korrektur ediert und im Kopfregeft auf die Existenz einer zweiten Fassung verwiesen.

### 3. Kopfregesten

Jedem Eintrag ist ein Kopfregeest in *kursiver* Schrift vorangestellt, welches zunächst das als Editionsgrundlage dienende Original beschreibt. Daran schließt sich eine kurze Beschreibung der Überlieferung an, die zur Kollationierung herangezogen wurde. Enthält die ausgewählte Vorlage verderbte Textpassagen (einzelne Buchstaben, Wörter oder Sätze), so findet ein Wechsel auf eine andere, an sich weniger gut erhaltene Überlieferung statt, falls dort der fragliche Text gut leserlich ist. Der Vorlagenwechsel wird im Kopfregeest beschrieben und an allen entsprechenden Textstellen kenntlich gemacht. Ein Kopfregeest enthält in der Regel folgende schematisierte Angaben:

- a) Fundort der als Grundlage verwendeten Überlieferung
- b) Foliiierung (Teil II)
- c) Gesamtumfang des Textes in Zeilen- (Teil I) bzw. Blattangaben (Teil II)
- d) Erhaltener Umfang
- e) Fehlende Blätter (Teil II)
- f) Schadensbeschreibung
- g) Bei Glasplattenüberlieferung zusätzlich eventuelle Fichierungsschäden
- h) Besonderheiten der Überlieferung bzw. des Textes (Teil II)
- i) Erschließungs- bzw. Rekonstruktionsarbeiten (Teil II)
- j) Beschreibung der zur Kollationierung verwendeten Originalüberlieferung
  - aa) Fundort
  - bb) Im Falle abweichender Foliiierung genaue Aufschlüsselung
  - cc) Keine nochmalige Nennung des Gesamtumfangs
  - dd) Erhaltener Umfang
  - ee) Fehlende Blätter (Teil II)
  - ff) Schadensbeschreibung
  - gg) Bei Glasplattenüberlieferung zusätzlich eventuelle Fichierungsschäden
  - hh) Abweichende Besonderheiten der Überlieferung bzw. des Textes
  - ii) Abweichende Erschließungs- bzw. Rekonstruktionsarbeiten
- k) Überlieferungswechsel (Teil II)

Ein Beispiel mag das für Teil I verdeutlichen:

*ZAS-Originale: 83 Zeilen Gesamtumfang, 83 Zeilen erhalten.*

*ZAS-Mikrofiches (Glasplatten): 83 Zeilen erhalten; Zeile 34, 35 leichte Schäden.*

Drei Beispiele mögen das Schema für Teil II veranschaulichen:

*IfZ-Originale: Fol. 1-17; 17 Bl. Gesamtumfang, 17 Bl. erhalten.*

*ZAS-Mikrofiches (Glasplatten): 17 Bl. erhalten.*

*ZAS-Mikrofiches (Glasplatten): Fol. 1-25; 25 Bl. Gesamtumfang, 25 Bl. erhalten; Bl. 8 sehr starke Fichierungsschäden; Bl. 6 Ende der milit. Lage erschlossen.*

*BA-Originale: Fol. 1-5, 7-25; 24 Bl. erhalten; Bl. 6 fehlt, Bl. 17, 18, 21-30 sehr starke Schäden; Bl. 1-5 abweichende Fassung der milit. Lage vorhanden.*

*Überlieferungswechsel: [ZAS ▶] Bl. 1-7, [BA ▶] Bl. 8, [ZAS ▶] Bl. 9-25.*

*HI-Originale: Fol. 1, 8-24, 26-30; [31] Bl. Gesamtumfang, 23 Bl. erhalten; Bl. 2-7, [19a], 25 fehlt, Bl. 1, 19-23, 29 leichte, Bl. 15-17 starke bis sehr starke Schäden; Bl. 1 milit. Lage für Bl. 1-7 angekündigt (Vermerk O.), milit. Lage nicht vorhanden, Bl. 19 "Bl. 19a einfügen" (Vermerk O.), Bl. 19a nicht vorhanden; Datum rekonstruiert.*

*ZAS-Mikrofiches (Glasplatten): Fol. 8-30; 23 Bl. erhalten; Bl. 1-7 fehlt, Bl. 12-14 leichte bis starke Schäden, Bl. 18-30 sehr starke Fichierungsschäden.*

*Überlieferungswechsel: [HI ▶] Bl. 1, 8-14, [ZAS ▶] Bl. 15-17, [HI ▶] Bl. 18-24, [ZAS ▶] Bl. 25, [HI ▶] Bl. 26-29, Zeile 4, [ZAS ▶] Bl. 29, Zeile 5, [HI ▶] Bl. 29, Zeile 6 - Bl. 30.*

Erläuterungen:

Zu a) Fundort der als Grundlage verwendeten Überlieferung

Sofern mehrere vollständige Überlieferungen eines Eintrags vorhanden sind, werden die Überlieferungsstränge in den Kopfregeisten nach folgender Reihung ausgewählt: *ZAS-Originale, IfZ-Originale, HI-Originale, NA-Originale, ZAS-Mikrofiches (Glasplatten), BA-Originale.*

Zu b, c und d) Foliiierung, Gesamtumfang des Textes in Zeilen- bzw. Blattangaben, erhaltener Umfang

Bei der Aufzählung von Zeilen/Blättern (nicht Foliiierung) in den Kopfregeisten werden zwei aufeinanderfolgende Zeilen/Blätter genannt und durch ein Komma voneinander getrennt (z. B. Zeile/Bl. 8, 9, nicht 8-9 oder 8 f.), drei oder mehr aufeinanderfolgende Zeilen/Blätter durch einen Bindestrich zusammengezogen (z. B. Zeile/Bl. 8-10, nicht 8 ff.).

Zur Beschreibung des maschinenschriftlichen Dokuments wird die Foliiierung des Stenographen verwendet (mit Ausnahme des ersten Blattes einer Eintragung, das der Stenograph in der Regel nicht foliierte und das in der Edition stillschweigend als Folio 1 bezeichnet wird; dies wird in den Fällen in eckige Klammern gesetzt "Fol. [1]", in denen der Bearbeiter nicht eindeutig entscheiden konnte, ob es sich um ein Ankündigungsblatt des Sekretärs oder um die tatsächliche erste Seite handelt). Über die Unregelmäßigkeiten und

Unzulänglichkeiten der Foliiierung wird im Kopfregeest Rechenschaft abgelegt, was sich in der Regel nur auf den ersten Überlieferungsstrang bezieht, es sei denn, die Foliiierung des zur Kollationierung herangezogenen zweiten Überlieferungsstranges weicht von der des ersten ab. In der Dokumentenbeschreibung folgt sodann der Gesamtumfang des jeweiligen Tagebucheintrags, der sich nach der abgezählten vorhandenen Blattzahl zuzüglich der aufgrund der Foliiierung als ursprünglich vorhanden anzusehenden Blätter richtet. Daran anschließend wird der tatsächlich erhaltene Umfang genannt. Ein einfaches Beispiel dazu:

*ZAS-Mikrofiches (Glasplatten): Fol. 1-30; 30 Bl. Gesamtumfang, 30 Bl. erhalten.*

Wurde aber eine Blattnummer zweimal vergeben, so bildet sich das wie folgt ab:

*ZAS-Mikrofiches (Glasplatten): Fol. 1-19, 20, 20, 21-25; 26 Bl. Gesamtumfang, 26 Bl. erhalten.*

Eingeschobene Blätter finden in folgender Weise Berücksichtigung:

*ZAS-Mikrofiches (Glasplatten): Fol. 1-3, 4a-4c, 5-31; 33 Bl. Gesamtumfang, 33 Bl. erhalten.*

Zusammengezogene Blätter:

*ZAS-Mikrofiches (Glasplatten): Fol. 1-3, 4/8, 9-20, 21/22, 23-28; 23 Bl. Gesamtumfang, 23 Bl. erhalten.*

Ein fehlendes Blatt bei unzusammenhängendem Text:

*ZAS-Mikrofiches (Glasplatten): Fol. 1-8, 10-30; 30 Bl. Gesamtumfang, 29 Bl. erhalten; Bl. 9 fehlt.*

Eine fehlende Blattnummer trotz fortlaufenden Textes:

*ZAS-Mikrofiches (Glasplatten): Fol. 1-8, 10-30; 29 Bl. Gesamtumfang, 29 Bl. erhalten.*

Bei einer gewissen Unsicherheit über den Gesamtumfang des Textes (z. B. Blattnumerierung nicht fortlaufend, Text anscheinend fortlaufend) wird die Blattanzahl des Gesamtumfangs in eckige Klammern gesetzt, z. B.:

*HI-Originale: Fol. 1-25, 27, 27; [27] Bl. Gesamtumfang, 27 Bl. erhalten.*

Unterlassene Foliiierung wird in eckiger Klammer nachgetragen, z. B.:

*IfZ-Originale: Fol. 1-15, [16], 17-20; 20 Bl. Gesamtumfang, 20 Bl. erhalten.*

Zu e) Fehlende Blätter im maschinenschriftlichen Tagebuch

Ein angekündigtes Blatt, das in der Überlieferung nicht enthalten ist, wird wie folgt notiert:

*HI-Originale: Fol. 1-39; [40] Bl. Gesamtumfang, 39 Bl. erhalten; Bl. [19a] fehlt; Bl. 19 "folgt Bl. 19a" (Vermerk O.), Bl. 19a nicht vorhanden.*

Ebenso wird eine angekündigte militärische Lage, die nicht vorhanden ist, behandelt, z. B.:

*HI-Originale: Fol. 1, 8-30; 30 Bl. Gesamtumfang, 24 Bl. erhalten; Bl. 2-7 fehlt; Bl. 1 milit. Lage für Bl. 1-7 angekündigt (Vermerk O.), milit. Lage nicht vorhanden.*

Unvollständige Eintragungen werden nach folgenden Formeln dargestellt:

Ein Beispiel für vermißten Text am Ende einer Eintragung:

*ZAS-Mikrofiches (Glasplatten): Fol. 1-38; mehr als 38 Bl. Gesamtumfang, 38 Bl. erhalten; Bl. 39 [f. o. ff.] fehlt.*

Ein Beispiel für unvollständigen Text am Anfang einer Eintragung:

*HI-Originale: Fol. 8-30; 30 Bl. Gesamtumfang, 23 Bl. erhalten; Bl. 1-7 fehlt.*

Unvollständiger Text des zweiten Überlieferungsstranges wird ebenfalls notiert, z. B.:

*IfZ-Originale: Fol. 1-17; 17 Bl. Gesamtumfang, 17 Bl. erhalten.*

*ZAS-Mikrofiches (Glasplatten): Fol. 1-7, 9-17; 16 Bl. erhalten; Bl. 8 fehlt.*

Läßt sich ein Gesamtumfang nur aus zwei Überlieferungssträngen eruieren, so wird dies gleichfalls festgehalten:

*IfZ-Originale: Fol. 7-25; 30 Bl. Gesamtumfang, 19 Bl. erhalten; Bl. 1-6, 26-30 fehlt.*

*ZAS-Mikrofiches (Glasplatten): Fol. 1-5, 21-30; 15 Bl. erhalten; Bl. 6-20 fehlt.*

Weicht die Folierung zweier Überlieferungsstränge voneinander ab, was darauf zurückzuführen ist, daß der Stenograph Korrekturen in der Zweitschrift nicht mehr vorgenommen hatte, so wird dies wie folgt dokumentiert:

*ZAS-Mikrofiches (Glasplatten): Fol. 1-6, 7a, 7b, 8-23; 24 Bl. Gesamtumfang, 24 Bl. erhalten.*

*BA-Originale: Fol. 1-5, 6, 6, 7-23; 24 Bl. erhalten.*

Fehlende Blätter werden grundsätzlich angeführt. Es heißt "Bl. (Blatt) 1-8 fehlt", nicht "Bll. (Blätter) 1-8 fehlen", z. B.:

*BA-Originale: Fol. 1-4, 9-97; 97 Bl. Gesamtumfang, 93 Bl. erhalten; Bl. 5-8 fehlt.*

Zu f) Schadensbeschreibung

Schäden im Text werden auch in den Kopfregeften vermerkt. Als Schaden gilt bereits die Zerstörung eines Buchstabens. Es wird unterteilt in leichte (bis 25 %), starke (bis 50 %) und sehr starke Schäden (über 50 %), z. B.:

*HI-Originale: Fol. 1-30; 30 Bl. Gesamtumfang, 30 Bl. erhalten; Bl. 1, 3, 20-23 leichte, Bl. 8-19 starke bis sehr starke Schäden.*

*ZAS-Mikrofiches (Glasplatten): Fol. 1-19, 20, 20, 21-25; 26 Bl. Gesamtumfang, 26 Bl. erhalten; Bl. 17-19, erstes Bl. 20, Bl. 24, 25 leichte Schäden, zweites Bl. 20, Bl. 21-23 sehr starke Schäden.*

Zu g) Bei Glasplattenüberlieferung zusätzlich eventuelle Fichierungsschäden

Schäden, die eindeutig beim Fotografieren auf die Glasplatte entstanden sind, werden als Fichierungsschäden vermerkt. Als Schaden gilt wiederum bereits die Zerstörung eines Buchstabens. Es wird ebenfalls unterteilt in leichte (bis 25 %), starke (bis 50 %) und sehr starke Fichierungsschäden (über 50 %), z. B.:

*ZAS-Mikrofiches (Glasplatten): Fol. 1-21; 21 Bl. Gesamtumfang, 21 Bl. erhalten; Bl. 3, 14, 17-20 leichte Schäden, Bl. 21 sehr starke Fichierungsschäden.*

Bei Mikrofilmen wird aufgrund der Zweitrangigkeit der Überlieferung keine Unterscheidung zwischen einzelnen Schadenssorten unternommen.

Zweifel an der Art des Schadens bei Textverlusten (Schäden am Papieroriginal oder an der Glasplatte, also Fichierungsschäden) wurden durch Autopsie der in Moskau aufbewahrten Glasplatten geklärt.

Zu h) Besonderheiten der Überlieferung bzw. des Textes im maschinenschriftlichen Tagebuch

Besonderheiten der Überlieferung und des Textes werden grundsätzlich in den Kopfregesten vermerkt.

Redaktionelle Vermerke des Stenographen Richard Otte bzw. seiner Vertretung werden festgehalten und mit dem Zusatz "(Vermerk O.)" (Vermerk des Stenographen im Original) versehen. Kündigt der Stenograph einen Einschub an, der jedoch fehlt, wird dies in den Kopfregesten erwähnt. Angekündigte, aber nicht vorhandene Blätter werden zum Gesamtumfang hinzugezählt, erscheinen jedoch selbstverständlich nicht in der Follierung. Kann nicht genau festgelegt werden, wieviele Blätter eingeschoben werden sollten, wird der Gesamtumfang in eckige Klammern gesetzt.

Beispiele für die Beschreibung von Einfügungen in den Kopfregesten:

*BA-Originale: Fol. 1-26; 26 Bl. Gesamtumfang, 26 Bl. erhalten; Bl. 7 Bericht Ribbentrop angekündigt (Vermerk O.), Bericht nicht vorhanden.*

*IfZ-Originale: Fol. 1, 5-25; 25 Bl. Gesamtumfang, 22 Bl. erhalten; Bl. 2-4 fehlt; Bl. 1 milit. Lage angekündigt (Vermerk O.), milit. Lage nicht vorhanden.*

Beispiele für Einfügungsvermerke, die per Zitat aus dem Dokumententext in die Kopfregesten übernommen werden:

*IfZ-Originale: Fol. 1-30; [31] Bl. Gesamtumfang, 30 Bl. erhalten; Bl. [19a] fehlt, Bl. 23 leichte Schäden; Bl. 19 "hier Bl. 19a" (Vermerk O.), Bl. 19a nicht vorhanden.*

*ZAS-Mikrofiches (Glasplatten) Fol. 1-4, 6-22; 22 Bl. Gesamtumfang, 21 Bl. erhalten; Bl. 5 fehlt; Bl. 4 Bericht "Angriff Essen!" angekündigt (Vermerk O.), Bericht nicht vorhanden; Bl. 6 Ende der milit. Lage erschlossen.*

Fehlt die militärische Lage vollständig ohne irgendeinen Vermerk des Stenographen, so findet dies keinen Niederschlag in den Kopfregesten. Dort erscheint lediglich ein Hinweis auf die fehlenden Blätter.



Ist ein militärischer Lagebericht (oder ein Tagebucheintrag) mit einer anderen Schreibmaschinentype geschrieben worden oder trägt er ungewöhnliche Vermerke (Stempel "Geheim" o. ä.), so wird dies in den Kopfregeften festgehalten, z. B.:

*IfZ-Originale: Fol. 1-28; 28 Bl. Gesamtumfang, 28 Bl. erhalten; Bl. 1-7 (milit. Lage) in abweichender Schrifttype, Bl. 1 mit Vermerk "Geheim".*

Existieren zwei militärische Lagen zu ein und demselben Tagebucheintrag, so wird dies in den Kopfregeften ebenfalls als Besonderheit notiert:

*ZAS-Mikrofiches (Glasplatten): Fol. 1-27; 27 Bl. Gesamtumfang, 27 Bl. erhalten; Bl. 1-6 abweichende Fassung der milit. Lage vorhanden.*

Referiert Goebbels die militärische Lage im laufenden Text anstelle einer militärischen Lage zu Beginn des Tagebucheintrages, so wird dies in den Kopfregeften als Besonderheit festgehalten, z. B.:

*HI-Originale: Fol. 1-25; 25 Bl. Gesamtumfang, 25 Bl. erhalten; Bl. 12-15 milit. Lage im Text referiert.*

Findet sich ein redaktioneller Vermerk des Stenographen offensichtlich auf einer Rückseite (Lochung am rechten Rand), so wird auch dies in den Kopfregeften erwähnt:

*IfZ-Originale: Fol. 1-20; 23 Bl. Gesamtumfang, 20 Bl. erhalten; Rückseite Bl. 5 "Bl. 5a-5c" angekündigt (Vermerk O.), Bl. 5a-5c nicht vorhanden.*

Kann die Blattnumerierung bei Rückseiten nicht eindeutig angegeben werden (etwa bei der Glasplattenüberlieferung), dann steht sie in den Kopfregeften in eckigen Klammern, z. B.:

*ZAS-Mikrofiches (Glasplatten): Fol. 9-19; 19 Bl. Gesamtumfang, 11 Bl. erhalten; Bl. 1-8 fehlt; [Rückseite Bl. 9] "Lagebericht" für Bl. 1-8 angekündigt (Vermerk O.), Lagebericht nicht vorhanden.*

Textrelevante Ankündigungen auf einem nicht foliierten Blatt werden im Kopfregeft unter "Bl. ohne Fol." notiert; das Ankündigungsblatt findet aber weder in der Foliiierung noch bei der Berechnung des Gesamtumfanges Berücksichtigung.

*HI-Originale: Fol. 1-4, 10-25; 25 Bl. Gesamtumfang, 20 Bl. erhalten; Bl. 5-9 fehlt; Bl. ohne Fol. milit. Lage für Bl. 1-9 angekündigt (Vermerk O.), Fortsetzung der milit. Lage Bl. 5-9 nicht vorhanden.*

Zu i) Erschließungs- und Rekonstruktionsarbeiten im maschinenschriftlichen Tagebuch

Erschließungs- und Rekonstruktionsarbeiten werden in den Kopfregeften gleichfalls festgehalten. Dies gilt nicht für Rekonstruktionen von Text, die lediglich durch eckige Klammern im Text gekennzeichnet werden.

Weist eine militärische Lage die Schlußzeichen des Stenographen an zwei Stellen auf oder fehlen diese am Ende des Lageberichts, so wird dies in den Kopfregeften vermerkt:

*ZAS-Mikrofiches (Glasplatten): Fol. 1-30; 30 Bl. Gesamtumfang, 30 Bl. erhalten; Bl. 5 Ende der milit. Lage erschlossen.*

Ist ein Text so zerstört, daß einzelne Fragmente nicht ediert werden können, so wird dies in den Kopfregesten als Rekonstruktion beschrieben, z. B.:

*BA-Originale: Fol. 1-23; [23] Bl. Gesamtumfang, 23 Bl. erhalten; Bl. 3-15 sehr starke Schäden; drei/mehrere/zahlreiche nicht edierte Fragmente.*

Hat der Bearbeiter Text aus Fragmenten zusammengesetzt, so wird dies in den Kopfregesten mitgeteilt, z. B.:

*BA-Originale: Fol. 1-27; 27 Bl. Gesamtumfang, 27 Bl. erhalten; Bl. 11, 13-27 rekonstruiert.*

Rekonstruierte bzw. erschlossene Daten und rekonstruierte Blattfolgen werden als solche gekennzeichnet, z. B.:

*IfZ-Originale: Fol. 1-28; 28 Bl. Gesamtumfang, 28 Bl. erhalten; Bl. 1 leichte Schäden; Datum rekonstruiert.*

*HI-Originale: Fol. 7-35; 35 Bl. Gesamtumfang, 29 Bl. erhalten; Bl. 1-6 fehlt; Datum erschlossen.*

*BA-Originale: Fol. 1-3, [4-6], 7, [8-10], 11-25; 25 Bl. Gesamtumfang, 25 Bl. erhalten;*

*Reihenfolge Bl. 4-6, 8-10 rekonstruiert.*

Bei der Zweitüberlieferung werden vorgenommene Rekonstruktions- bzw. Zuordnungsarbeiten nicht im einzelnen beschrieben. Statt dessen wird unter "Erschließungen/Rekonstruktionen" ein Sigel gesetzt:  $\Sigma$ . Dieses Sigel kann bedeuten: Datum rekonstruiert oder erschlossen, Fragmente anhand der Erstüberlieferung zugeordnet, Text rekonstruiert, Blatt rekonstruiert; z. B.:

*ZAS-Mikrofiches (Glasplatten): Fol. 1-20; 20 Bl. Gesamtumfang, 20 Bl. erhalten.*

*BA-Originale: Fol. 1-10, [11-20]; 20 Bl. erhalten; Bl. 1-20 starke bis sehr starke Schäden;  $\Sigma$ .*

Zu k) Überlieferungswechsel im maschinenschriftlichen Tagebuch

Bei einem Vorlagenwechsel werden die aus der jeweiligen Überlieferung verwendeten Blätter bzw. Zeilen angegeben. Bei Schäden an einem Wort oder an mehreren Wörtern liegt es im Ermessen des jeweiligen Bearbeiters, wieviel Text (ein Wort, mehrere Wörter oder die gesamte Zeile) aus den verwendeten Überlieferungen entnommen wird.

Erstüberlieferung (z. B.: ZAS-Mikrofiches) Bl. 20, Zeile 7-12:

7 Ueber Tag finden [redacted] auf Augsburg und  
8 Schweinfurt [redacted] n hier Flugzeug-  
9 werke angegriffen, in Augsburg hauptsächl. [redacted] die  
10 Messerschmitt-Werke. Die dort angerichteten Schä-  
11 den [redacted] als mittelschwer zu bezeichnen. Mit den  
12 Wiederaufbaumaßnahmen wurde bereits begonnen.

Zweitüberlieferung (z. B.: BA-Originale) Bl. 20, Zeile 7-12:

7 Ueber Tag finden Angriffe auf Augsburg und  
8 [redacted] Schweinfurt statt. Wiederum werden hier Flugzeug-  
9 [redacted] angegriffen, in Augsburg hauptsächlich die  
10 [redacted] tt-Werke. Die dort angerichteten Schä-  
11 den sind als mittelschwer zu bezeichnen. Mit den  
12 Wiederaufbaumaßnahmen wurde bereits begonnen.

Zwei Möglichkeiten der Darstellung im Text:

Überlieferungswechsel am zerstörten Text:

Über Tag finden [BA▶] Angriffe [ZAS▶] auf Augsburg und Schweinfurt [BA▶] statt. Wiederum werden [ZAS▶] hier Flugzeugwerke angegriffen, in Augsburg [BA▶] hauptsächlich [ZAS▶] die Messerschmitt-Werke. Die dort angerichteten Schäden [BA▶] sind [ZAS▶] als mittelschwer zu bezeichnen. Mit den Wiederaufbaumaßnahmen wurde bereits begonnen.

Überlieferungswechsel bis zu einer Zeile:

[BA▶] Über Tag finden Angriffe auf Augsburg und [ZAS▶] Schweinfurt [BA▶] statt. Wiederum werden hier [ZAS▶] Flugzeugwerke angegriffen, in Augsburg [BA▶] hauptsächlich die [ZAS▶] Messerschmitt-Werke. Die dort angerichteten Schäden [BA▶] sind als mittelschwer zu bezeichnen. Mit den [ZAS▶] Wiederaufbaumaßnahmen wurde bereits begonnen.

Darstellung im Kopfrege:

*ZAS-Mikrofiches (Glasplatten): Fol. 1-25; 25 Bl. Gesamtumfang, 25 Bl. erhalten; Bl. 20 leichte Schäden.*

*BA-Originale: 25 Bl. erhalten; Bl. 20 leichte Schäden.*

*Überlieferungswechsel: [ZAS▶] Bl. 1-20, Zeile 6, [BA▶] Bl. 20, Zeile 7, [ZAS▶] Bl. 20, Zeile 8, [BA▶] Bl. 20, Zeile 8, [ZAS▶] Bl. 20, Zeile 8, [BA▶] Bl. 20, Zeile 9, [ZAS▶] Bl. 20, Zeile 10, [BA▶] Bl. 20, Zeile 11, [ZAS▶] Bl. 20, Zeile 12 - Bl. 25.*

## 4. Textbearbeitung

Die Tagebucheintragungen werden unverkürzt ediert; die jeweiligen Überschriften, Untergliederungen und Absätze, auch Zahlen und Ziffern (bzw. deren Ausschreibung) u. a. entsprechen formal weitgehend der Vorlage. Orthographische und grammatikalische Eigenheiten des handschriftlichen Textes bleiben erhalten. Von Joseph Goebbels gestrichene Worte bzw. Satzteile werden in eckigen Klammern *kursiv* gesetzt und mit dem Bearbeitervermerk "durchgestrichen" versehen; z. B. "... danach ist [*"Franco" durchgestrichen*] Antonescu ein Werkzeug der Freimaurer ...". Die vom Stenographen Richard Otte bei seinen kurzfristigen Transkriptionsversuchen vorgenommenen Unterstreichungen von Worten, die er nicht entziffern konnte, werden grundsätzlich nicht berücksichtigt, ebenso wenig wie Korrekturen oder Vorschläge zur Streichung als privat erachteter Passagen von fremder Hand (mittels eckiger Klammer). Eine Datumsangabe am Ende einer Eintragung findet gleichfalls keine editorische Beachtung, da sie von Otte stammt und den Zeitpunkt seiner Transkriptionsversuche markiert. Die vom Stenographen in der maschinenschriftlichen Vorlage hervorgehobenen Stellen (etwa Unterstreichungen, Sperrungen) werden hingegen übernommen, aber einheitlich in *g e s p e r r t e m* Druck wiedergegeben. Auf die Abbildung der abschließenden drei Striche am Ende einer diktierten Eintragung wird jedoch verzichtet.

### a) Behandlung der militärischen Lage im maschinenschriftlichen Tagebuch

Die Autorschaft der militärischen Lage steht nicht in allen Fällen zweifelsfrei fest. In der Regel mag es sich um ein Diktat von Joseph Goebbels auf der Grundlage des militärischen Lageberichts gehandelt haben, mitunter aber auch einfach um die Mitschrift oder Abschrift des Lagevortrags, den der Verbindungsoffizier vom Oberkommando der Wehrmacht täglich dem Reichspropagandaminister zu erstatten hatte. Um den unterschiedlichen Charakter der Eintragsteile optisch genügend abzuheben, ist die militärische Lage nicht nur durch einen größeren Abstand von der eigentlichen Eintragung getrennt, sondern auch in kleinerem Druck wiedergegeben. Die Trennstriche zwischen Eintrag und dem jeweils vorangestellten militärischen Lagebericht werden nicht abgebildet. Paraphrasiert Joseph Goebbels im freien Diktat die militärische Lage, so wird diese durch je eine Leerzeile am Beginn und am Ende der Paraphrase abgesetzt.

### b) Editorische Eingriffe

Alle weiteren editorischen Bearbeitungen sind, um ebenfalls optisch vom Dokumententext abgehoben zu sein, in *Kursivschrift* wiedergegeben (Kopfregesten und Anmerkungen). Im fortlaufenden Text der einzelnen Eintragungen sind die Bearbeitervermerke zusätzlich noch von eckigen Klammern eingeschlossen.

### **c) Korrekturen des Stenographen**

Es gilt das Editionsprinzip "Fassung letzter Hand". Insofern werden Korrekturen bzw. Korrekturvorschläge des Stenographen im von Goebbels handschriftlich niedergelegten Teil nicht ediert. Hingegen werden die maschinen- und handschriftlichen Korrekturen, die der Stenograph Richard Otte bzw. bei seiner Verhinderung dessen Stellvertretung im gesamten maschinenschriftlichen Text angebracht haben, ausnahmslos übernommen, auch wenn sie möglicherweise falsch oder mißverständlich sein könnten, was dann - wie üblich bei Textungereimtheiten - mit einem Ausrufezeichen in eckigen Klammern vermerkt ist. Ansonsten werden diese Korrekturen nicht gekennzeichnet, da sie ja nicht vom Autor stammen, sondern von demjenigen, der Fehler oder Unzulänglichkeiten der Übertragung des Stenogramms zu korrigieren hatte. Kamen dabei dem Stenographen Zweifel, gab er selbst dies durch ein Fragezeichen oder durch voneinander differierende Angaben (Orts-, Personennamen, Zahlen usw.) zu erkennen. Wo er diese Zweifel nicht mehr überprüft hatte, muß der Bearbeiter die Angaben eruieren und in einer Anmerkung richtigstellen bzw. bei ergebnisloser Recherche als "nicht ermittelt" kennzeichnen. Die vom Stenographen alternativ notierten Angaben bzw. die von ihm stammenden Fragezeichen werden in spitze Klammern gesetzt.

### **d) Redaktionelle Vermerke des Stenographen im maschinenschriftlichen Tagebuch**

Redaktionelle Vermerke Richard Ottes von inhaltlicher Bedeutung werden - wie oben erwähnt - sowohl im Kopfregeest unter Besonderheiten als auch an der entsprechenden Stelle im Dokumententext kurz und zum Teil mit verkürztem bzw. vollständigem Zitat notiert, wie zum Beispiel:

*[hier angekündigter Brief Ribbentrop nicht vorhanden]*

*[hier angekündigter Bericht "Angriff Essen!" nicht vorhanden]*

*[hier angekündigte milit. Lage, Bl. 1-5, nicht vorhanden]*

Fehlt das Ende einer militärischen Lage, so wird dies im Text mit dem Zusatz "*[Fortsetzung nicht vorhanden]*" verdeutlicht - dies gilt auch dann, wenn der Stenograph lediglich die ersten drei Wörter ("Gestern: Militärische Lage:") geschrieben hatte -, und gibt ein redaktioneller Vermerk des Stenographen darüber hinaus Aufschluß über die Gründe des Nichtvorhandenseins einer militärischen Lage oder eines Einschubes, so wird dieser möglichst in Gänze zitiert, z. B.:

Gestern:

Militärische Lage:

*[Fortsetzung nicht vorhanden. "Bericht an anderer Stelle vor Auswertung versehentlich vernichtet. Rekonstruktion nicht möglich."]*

Findet sich nur ein redaktioneller Vermerk Ottos (z. B. "Bl. 1-7 milit. Lage nachtragen"), setzt der Text bei der eigentlichen Tagebucheintragung ein.

Freigelassene Stellen für beabsichtigte, aber nicht erfolgte Ergänzungen werden mit drei Strichen in eckiger Klammer [- - -] gekennzeichnet. Dies gilt für einzelne Wörter (zumeist Eigen- und Ortsnamen oder Zahlen) sowie für fehlende Einschübe (Berichte, Statistiken usw.), die nicht angekündigt sind.

Unbeschriebene oder zum Teil unbeschriebene Seiten, Lücken im laufenden Text u. ä. ohne jeglichen Hinweis darauf, daß noch Text eingefügt werden sollte, werden nicht mit einer editorischen Bemerkung versehen.

## **e) Schäden**

Jeder Satz, jedes entzifferbare Wort, jeder noch lesbare Buchstabe, soweit er in einem erkennbaren Wortzusammenhang steht, wird dokumentiert. Bei sehr stark fragmentiertem Text finden im allgemeinen jedoch auch Buchstaben bzw. Buchstabenfolgen ohne erkennbaren Wortzusammenhang Aufnahme, wenn sie eindeutig einer Zeile zuzuordnen sind. Die vor allem durch unsachgemäße Aufbewahrung entstandenen Schäden auf den Originalpapieren bzw. auf den Glasplatten werden an der jeweiligen Textstelle, auch wenn es sich nur um einen einzelnen Buchstaben handelt, durch drei in eckigen Klammern gesetzte Punkte [...] markiert; größere Schäden werden in Worten beschrieben. Wie Überlieferungsstörungen gekennzeichnet werden, soll an einigen Beispielen veranschaulicht werden:

Wortfragmente werden mit drei Punkten in eckigen Klammern an der verderbten Textstelle angedeutet, z. B.: Refe[...], [...]befehl.

Bei eindeutiger Evidenz wird der unleserliche oder fehlende Buchstabe in eckiger Klammer ergänzt, z. B.: Krieg[f]ührung. Auch ein ganzes Wort kann bei eindeutiger Evidenz eingefügt werden, z. B.: "wenn mit letzter Sicherheit klar ist, [daß] kein Fehler unterlaufen ist". Sind andere Lesarten nicht völlig ausgeschlossen, so unterbleibt eine Ergänzung. Das fehlende Wort in einer Passage wie der folgenden: "Es möglich, daß" wird mit drei Punkten in eckiger Klammer markiert: "Es [...] möglich, daß", da es mehrere Alternativen gibt, z. B.: "Es ist/war/scheint/schien möglich, daß".

Fehlende Buchstaben am rechten Rand werden nur dann stillschweigend ergänzt, wenn erkennbar ist, daß der Stenograph über die rechte Randbegrenzung hinaus geschrieben hat, ohne zu merken, daß die Buchstaben nicht auf das Papier gedruckt wurden.

Unvollständige Sätze werden vermerkt: [*Satzanfang fehlt*], [*Satzende fehlt*]. Ist der letzte Satz des gesamten vorhandenen Eintrags nicht vollendet, erscheint ein Bearbeitervermerk [*Fortsetzung fehlt*], da nicht eruierbar ist, wieviel Text tatsächlich zu Verlust gegangen ist.

Zerstörte oder unlesbare Wörter bis zu einer Zeile werden durch drei Punkte in eckigen Klammern [...] kenntlich gemacht.

Ist mehr als eine Zeile Text zerstört, wird dies in der eckigen Klammer genauer angegeben: [eineinhalb Zeilen unleserlich], [drei Zeilen zerstört], [zwei Blätter fehlen]; bei fragmentiertem Text, der keine genaue Blatt- bzw. Zeilenangabe zulässt, heißt es: [mehrere Blätter fehlen], [mehrere Zeilen fehlen].

Fragmente, die keinem foliierten Blatt zugeordnet werden können, sind nach ihrer mutmaßlichen Reihenfolge durchnummeriert und zu Beginn des jeweiligen Textabschnittes mit "[Fragment 1]", "[Fragment 2]" usw. bezeichnet. Foliierte Blätter innerhalb einer Fragmentenfolge werden zu Beginn mit den Blattangaben gekennzeichnet, um sie von den Fragmenten abzusetzen. Bei der Edition von Fragmenten wird das Zeichen für zerstörte oder unleserliche Wörter "[...]" am Anfang und am Ende eines Fragmentes gesetzt, z. B.:

|            |                                                      |
|------------|------------------------------------------------------|
| Zeile 1    | dem Duce und der faschistischen [...] ile zuzu-      |
| Zeile 2    | schanzen, da er in der Tat noch [...] itische        |
| Zeile ?    | Göring [...] ebuch des Duce gelesen, das             |
| Zeile ?    | bei irgend[...] t in unsere Hän-                     |
| Zeile ?    | de gefallen ist. [...]                               |
| Follierung | - 7 -                                                |
| Zeile 1    | Theaterbilanz. Wenn uns die Theater nicht noch       |
| Zeile 2    | ausbombardiert werden, können wir in dieser [...]    |
| Zeile 3    | ziehung sehr zufrieden [...]                         |
| Follierung | -                                                    |
| Zeile 1    | [...]                                                |
| Zeile 2    | [...]                                                |
| Zeile 3    | [...]ber allen unseren Besprechungen steht am        |
| Zeile 4    | Ende [...]ieder der Glaube an das Reich und die Aus- |

Darstellung im Text:

[*Fragment 1*] [...] dem Duce und der faschistischen [...] ile zuzuschanzen, da er in der Tat noch [...] [pol]itische [...]

[*Fragment 2*] [...] Göring [...] [Tag]ebuch des Duce gelesen, das bei irgend[...] [...] [...]t in unsere Hände gefallen ist. [...]

[*Bl. 7*] [...] Theaterbilanz. Wenn uns die Theater nicht noch ausbombardiert werden, können wir in dieser [Be]ziehung sehr zufrieden [...]

[*Fragment 3*] [*Zwei Zeilen zerstört.*] [...] [...]ber allen unseren Besprechungen steht am Ende [w]ieder der Glaube an das Reich und die Aus[...] [...]

## f) Erschließungs- und Rekonstruktionsarbeiten

Ein fehlendes Datum vor einem Tagebucheintrag ist erschlossen und in eckigen Klammern gesetzt; bei Datumsfragmenten werden die entsprechenden rekonstruierten Teile (Buchstaben bzw. Ziffern) gleichfalls mit eckigen Klammern versehen, z. B. [3. August 1943 (Mittwoch)] bzw. [5. Aug]ust 1943 (Fre[it]ag).

Fehlt die Kennzeichnung des Endes einer militärischen Lage, so wird dieses inhaltlich erschlossen. Ebenso wie bei vorhandener Kennzeichnung wird der militärische Lagebericht durch größeren Abstand und Wechsel der Schriftgröße optisch vom darauffolgenden Text abgesetzt. Weist eine militärische Lage an zwei Textstellen die drei Endstriche auf, so werden die ersten drei durch einen größeren Absatz markiert, der Schriftgrößenwechsel erfolgt jedoch erst nach den zweiten Endstrichen. In jedem der Fälle ist die Erschließungsarbeit im Kopfrege festgehalten.

## **g) Interpunktion, Sprache und Orthographie**

Die Interpunktion folgt weitestgehend der Vorlage. Nur in Teil II wird dort korrigierend eingegriffen, wo der Stenograph ein Komma offensichtlich übersehen hat (Aufzählung usw.), ein fehlendes oder falsch eingefügtes Satzzeichen den Sinn- und Lesezusammenhang stört oder einen Schreibfehler nach sich ziehen würde (z. B.: wenn statt eines Kommas fälschlicherweise ein Punkt gesetzt und der laufende Text mit einem kleingeschriebenen Wort fortgesetzt wurde).

Ein in Teil II das Kopfdatum abschließender Punkt bleibt unberücksichtigt.

Die in einer Vorlage enthaltenen Versehen, grammatikalische Fehler, etwa falsch angewandte Konjunktive oder verfehlte Verbkonjugationen und vor allem auch verfehlte Ausdrucksweisen, werden als Stileigenheiten des Autors ebenfalls übernommen, z. B. "Frick ist im Moment noch nicht bereitzufinden, das Reichsprotektorat zu übernehmen." - "Jedenfalls benimmt er sich durchaus nicht als ein Neuling im Reichskabinett, sondern als ein richtiger Justizminister." - "Eine Menge von Bomben haben heute Berlin getroffen." "Gutterer berichtet, alles stände für den Empfang bereit."

Lediglich falsche Satzkonstruktionen, die keinen Sinn ergeben (falsches Verb, fehlender Satzteil usw.), werden durch ein Ausrufezeichen in eckigen Klammern [!] markiert, z. B. "Der deutsche Soldat steht und wankt nicht [!]." - "Ich schaue mir wieder einmal das Kartenbild genau an. Danach ergibt sich, daß es zwar wieder sehr bunt geworden ist, aber in keiner Weise dem katastrophalen Bilde verglichen werden kann [!], das die Karte im vergangenen Winter bot." Da in letzterem Fall nicht eindeutig entschieden werden konnte, ob bei der Übertragung vom Stenogramm das "mit" vergessen worden ist, oder ob Goebbels den Satz während des Diktierens verändert hat, steht in diesem Fall das Ausrufezeichen [!] am Ende des strittigen Satzteiles. Die Alternative war entweder "... aber in keiner Weise [mit] dem katastrophalen Bilde verglichen werden kann, ..." oder "... aber in keiner Weise dem katastrophalen Bilde gleichgesetzt werden kann, ...".

Eine Liste der häufig vorkommenden Stileigenheiten wird zusammen mit den Gesamtregistern im Anmerkungsband veröffentlicht, für dessen leichtere Benutzung die Zeilennumerierung pro Tagebucheintrag in Fünferintervallen erfolgt ist.

Die Orthographie von Joseph Goebbels wird in Teil I konsequent aus Gründen der Authentizität übernommen ebenso die unterschiedliche Schreibweise ein und desselben Wortes, z.



B.: "U-Boot", "Uboot", "UBoot". Bei den Diktaten ist die Orthographie den Vorschriften des "Duden" (Ausgabe 201991) stillschweigend angeglichen, da es ja nicht die des Tagebuchautors ist. Die wohl häufigsten Abweichungen von der Dudenschreibweise leistet sich Goebbels in der Groß- statt Kleinschreibung, so z. B. "im Allgemeinen" (statt "im allgemeinen"), "im Argen", "im Dunkeln", "im Einzelnen", "im Ganzen", "im Geringsten", "im großen Ganzen", "im Klaren", "im Kleinen", "im Übrigen", "im Wesentlichen", "in Acht nehmen", "auf Seiten", "bis auf Weiteres", aber auch umgekehrt in der Klein- statt Großschreibung, z. B. "am morgen" (statt "am Morgen"), "der rechte", "ein hin und her", "es ist abend".

Entgegen der Dudenregel wandte Goebbels auch Getrenntschreibung an (z. B. "fallen lassen" statt "fallenlassen", "voraus ahnen" statt "vorausahnen", "klar werden" statt "klarwerden"), häufiger aber Zusammenschreibung ("garnicht" statt "gar nicht", "Gottseidank" statt "Gott sei Dank", "irgendetwas" statt "irgend etwas", "mobilmachen" statt "mobil machen", "vonseiten" statt "von seiten", "zuende" statt "zu Ende" u. ä.).

Nicht selten griff Goebbels auf veraltete Schreibweisen zurück, wie z. B. "Cairo", "Carriere", "Cavalier", "Coblenz", "Cöln", "Collaboration", Wörter, die heute mit "K" zu schreiben sind.

Zuweilen unterlaufen dem Tagebuchautor dialekt- bzw. umgangssprachlich bedingte Falschschreibungen wie "Bankies" statt "Bankiers", "kitzlich" statt "kitzelig", "Knax" statt "Knacks", "Lorbern" statt "Lorbeeren" usw.

Aus dem Französischen abgeleitete Begriffe, wie z. B. "Desaster", "Monster" etc., schrieb Goebbels mit Vorliebe in der französischen Form, also "Desastre" bzw. "Monstre". Die Schreibung englischer Ausdrücke legt gewisse Unsicherheiten offen: "Bobbys" statt "Bobbies", "Hurrican" statt "Hurrikan", "Jankees" statt "Yankees", "klefer" statt "clever", "Tommies" statt "Tommys" u. ä.

Das gesamte Tagebuch ist durchsetzt von Falschschreibungen wie z. B. "agressiv", "Albdrücken", "Apetit", "Konkurenz", "Konvoy". "Lybien", "Parlaver", "schwadronnieren", "Schaffot", "Terasse", "unterdeß". Die häufigsten orthographischen Eigenheiten sollen im Band mit den Indizes aufgelistet erscheinen.

Im maschinenschriftlichen Teil werden unbedeutende Tippfehler stillschweigend verbessert. Gravierende Schreibversehen werden hingegen mit einem [!] markiert, z. B. kann in einem Satz wie dem folgenden nicht beurteilt werden, wie der offensichtliche Tippfehler eindeutig ("entschieden" oder "entscheidend") zu verbessern wäre: "Der Kampf um das Donez-Becken wird als entscheiden [!] geschildert." Es lag im Ermessen des Bearbeiters, Stileigenheiten, die möglicherweise als übersehene Tippfehler interpretiert werden könnten, vorsorglich mit einem Ausrufezeichen zu versehen, z. B.: "Hier wurde eine gänzlich falsche Führerauslese getrieben [!]"

Falsch geschriebene Orts- und Eigennamen werden nur dann stillschweigend korrigiert, wenn sie im nächsten Textumfeld korrekt wiedergegeben sind und somit als Tippfehler interpretiert werden können. In allen anderen Fällen wird die falsche Schreibweise in einer Anmerkung richtiggestellt.

## **h) Richtigstellungen in Anmerkungen**

Die Anmerkungen beschränken sich auf die Richtigstellung von falschen Datumsangaben, Personen- und Ortsnamen. Bei den mit Fragezeichen versehenen Personen- und Eigennamen, die zu ermitteln waren, erfolgt in der Anmerkung die Richtigstellung bzw. im negativen Fall die Notiz "nicht ermittelt". Sowjetische, arabische, chinesische Ortsnamen erhalten zusätzlich ein Sigel, ein Sternchen (\*), da es sich bei der Übertragung aus dem Kyrillischen, Arabischen bzw. Chinesischen in das lateinische Alphabet nur um eine annähernd richtige deutsche, aber nicht weltweit verbindliche Schreibweise handeln kann. Falsch geschriebene Titel von Filmen, Zeitungen, Artikeln u. ä. bleiben vorerst ohne Richtigstellung; diese erfolgt im Sachkommentar, der - wie im Vorwort ausgeführt - im Anschluß an die Textbände erscheinen wird.

## **5. Bestandsübersicht**

Sämtliche für die Edition herangezogenen originalüberlieferten Einträge sind der Bestandsübersicht im Anhang eines jeden Bandes zu entnehmen (bei den Bänden von Teil I der Edition Gesamtbestandslisten sämtlicher handschriftlicher Tagebücher, bei Teil II jeweils Teilbestandsübersichten der im jeweiligen Band behandelten Diktatsabschnitte). Bei fragmentiertem Erhaltungszustand erfolgt nach der Angabe der erhaltenen Blätter der Zusatz "F." Bei sehr starker Fragmentierung erfolgt nur die Abkürzung "F.". Bei nicht genau anzugebendem Gesamtumfang wird das Zeichen ">" für "mehr als" vor die genannte Blattzahl gesetzt. Tage ohne Eintrag werden editorisch nicht berücksichtigt, da nicht bewiesen werden kann, daß Joseph Goebbels an diesen Tagen jeweils einen Eintrag diktiert hat und diese dann verlorengegangen sind. Sie erscheinen demzufolge auch nicht im Bestandsverzeichnis.

## **6. Register**

Für die Verifizierung von Personennamen wurden Nachschlagewerke, Dienstalterslisten, Stammrollen, Ranglisten, Jahrbücher, Geschäftsverteilungspläne, Telefonlisten, Adressenwerke usw. benutzt, für die Überprüfung der Ortsnamen Kriegstagebücher, Tagesmeldungen, Wehrmachtsberichte, Ortsverzeichnisse, Atlanten, Heereskarten usw. herangezogen.

## **a) Personenregister**

In das Personenverzeichnis werden alle namentlich aufgeführten Personen aufgenommen, in der Regel aber nicht diejenigen, die nur mit ihrem Titel und/oder ihrer Amts- bzw. Dienstgradbezeichnung und/oder mit ihrer Funktion erwähnt worden sind. Weder der "Erzbischof von Canterbury", irgendein "Propagandaamtsleiter", der "bekannteste Maler des Reiches" noch der "italienische König" finden Aufnahme. Auch die "Kinder" von Joseph Goebbels bleiben im Register unberücksichtigt, wenn sie nicht namentlich genannt werden. Eine Ausnahme bilden die Personen Hitler, Mussolini, Göring, Himmler, Ante Pavelić, Hirohito und Eugenio Pacelli, die auch dann aufgenommen werden, wenn sie als "Führer", "Duce", "Reichsmarschall", "Reichsführer SS", "Poglavnik", "Tenno" bzw. "Papst" titulierte worden sind. Das Register erstreckt sich sowohl auf zeitgenössische als auch auf historische Personen. Fiktive Gestalten aus der Literatur werden hingegen nicht berücksichtigt. Aufnahme finden auch adjektivisch gebrauchte Personennamen (z. B. "bismarcksches Kabinettstückchen") und solche in Verbindung mit einem Substantiv (z. B. "Stalin-Befehl"), solange sie nicht als eindeutig sachbezogen gelten müssen, wie z. B. "Hitler-Stalin-Pakt", "Göringstraße" oder "Kruppstadt", und infolgedessen in das Sachregister gehören.

Die Identifizierung der in den Tagebucheinträgen genannten Personen beschränkt sich auf den vollständigen Namen (gegebenenfalls auch Pseudonyme). Sämtliche Personennamen werden verifiziert, fehlende Vor- oder auch zusätzliche Familiennamen nach Möglichkeit ergänzt. Dies gilt auch für die Erfassung von Ehefrauen. Kann der Vorname einer Ehefrau nicht eruiert werden, findet sie Aufnahme unter dem Namen ihres Mannes ("Ripke, Axel und Frau"). Steht der Vorname nicht zweifelsfrei fest, wird dieser in eckige Klammern gesetzt. Bei nicht zu eruiierenden Vornamen, werden aus dem Text nähere Angaben übernommen: Dienstgrad, Amtsbereich, akademischer Grad, möglicherweise nur ein Ort. Personen, bei denen trotz aller Bemühungen nicht überprüft werden kann, ob ihr Name in den Tagebüchern korrekt wiedergegeben ist, werden im Register nicht festgehalten. Angesichts zahlreicher, letztgültig (auch aus Zeitgründen) nicht zu identifizierender Personen wird die Regel für die frühen handschriftlichen Tagebücher (Bd. 1-3) dahingehend erweitert, daß mitunter im Register auch nicht verifizierbare Namen in eckigen Klammern aufgenommen werden, wenn diese eindeutig lesbar sind.

Die Schreibweise von ausländischen Eigennamen stützt sich im wesentlichen auf die Regeln, die in den ADAP-Serien angewandt wurden (Akten zur deutschen auswärtigen Politik 1918-1945, Serie E 1941-1945, Bd. 1-8, Göttingen 1969-1979 und aus Serie D vor allem das Personenverzeichnis zu Bd. 1-7, Göttingen 1991).

## **b) Geographisches Register**

Im geographischen Register finden Aufnahme Orte und Stadtteile sowie Landschaftselemente, wie z. B. Inseln, Seen, Flüsse, Meere, Meeresbuchten, Meeresengen, Gebirge, Berge, Täler, Pässe, Sumpfgebiete, Tiefebene usw. Nicht ausgeworfen werden Großregionen wie Kontinente und Teilkontinente sowie Verwaltungsgebiete wie Staaten,

Länder, Gaue, Provinzen oder auch Straßen, Plätze, Gebäude, Parkanlagen usw., die allesamt Aufnahme im Sachregister finden werden.

Im Index finden sich auch Ortsnamen, die synonym für eine Regierung oder ein Regierungssystem verwandt wurden, z. B. "Vichy-Regierung", "Nanking-China", "London verbessert seine Beziehungen zu Stalin".

Analog zu dem Verfahren bei den Personennamen werden auch adjektivisch gebrauchte Ortsnamen und Ortsnamen in einer Wortkombination indiziert (z. B. "Wiener Opernwelt", "Casablanca-Konferenz").

Abgekürzt gebrauchte Ortsnamen sind, ohne in einer Anmerkung vervollständigt zu werden, im Register aufgenommen mit Verweis auf die amtliche Bezeichnung, z. B. "Spezia → La Spezia", "Godesberg → Bad Godesberg".

Keine Aufnahme finden reine Sachbegriffe, auch wenn in ihnen ein Ortsname enthalten ist, z. B. "Frankfurter Würstchen", "Berliner Tageblatt".

Gleichfalls unberücksichtigt bleiben synonym bezeichnete Orte, die erst hätten verifiziert werden müssen, z. B. "Hauptstadt der Bewegung", "Führerhauptquartier" u. a. Sie werden im Sachregister indiziert; eine Ausnahme bildet der Begriff "Reichshauptstadt", der unter "Berlin" registriert ist.

Zusammengesetzte erdkundliche Namen sind unter dem übergeordneten Ortsbegriff ausgeworfen, z. B. erscheint die "Quebecer Konferenz" unter dem Stichwort "Quebec", die "Mius-Front" unter "Mius" und die "Bucht von Messina" unter "Messina".

### **c) Transkription**

Eindeutig falsch geschriebene Orts- und Personennamen werden - wie erwähnt - in einer Anmerkung richtiggestellt. Die Verifizierung bzw. Korrektur falsch geschriebener Ortsnamen wird anhand oben genannter Hilfsmittel vorgenommen. Im Falle der russischen Ortsnamen wird die Originalschreibweise anhand des "Russischen geographischen Namensbuch" (begründet von Max Vasmer, hrsg. von Herbert Bräuer, Bd. 1-10, Wiesbaden 1964-1981) ermittelt; im Falle von russischen Eigennamen wird jeweils die kyrillische Originalschreibweise überprüft. Im Dokumententext bleibt die Schreibweise des Stenographen unkorrigiert erhalten, wenn sie nicht eindeutig falsch ist, im Register wird aber auf die Transkription verwiesen, die der "Duden" für die Wiedergabe russischer bzw. kyrillischer Eigen- und Ortsnamen vorschlägt. Um Verwechslungen zu vermeiden, wird die Duden-Transkription in zwei Punkten modifiziert: So erscheint das harte russische "i" als "y" und nicht als "i", das russische jotierte "i" als "j" und nicht, wie vom Duden vorgeschlagen als "i" bzw. überhaupt nicht. Von dieser Transkription wird auch dann abgewichen, wenn sich im deutschen Sprachgebrauch eine bestimmte Schreibweise fest eingebürgert hat, z. B. "Krim" statt "Krym", "Wlassow" statt "Wlasow".
